# Supplementary material for: Success Score: A Deep Learning Framework for Predicting Football Match Outcomes and Evaluating Team Performance
Source: Research Square preprint supplement (doi:10.21203/rs.3.rs-7736577/v1), 2025-10-20
Supplement: Supplementary file 1 [file a16a11b7f75cedf62fd22557.docx]

**Supplementary Information for:**

*Success Score: A Deep Learning Framework for Predicting Football Match Outcomes and Evaluating Team Performance*

**Authors:** Farzam Manafzadeh, Changiz Eslahchi, Hadi Nobari

**Supplementary Figure S1. Distribution of home vs away Success Scores.**

Density (or histogram) plots of Success Scores for home and away teams over 2020–2021 to 2022–2023 across four leagues. Home distributions are consistently right-shifted relative to away, indicating a measurable home advantage (paired one-sided t-test comparing home vs away scores: t = 13.24, p = 3.18×10⁻³⁹). *SS, Success Score.*


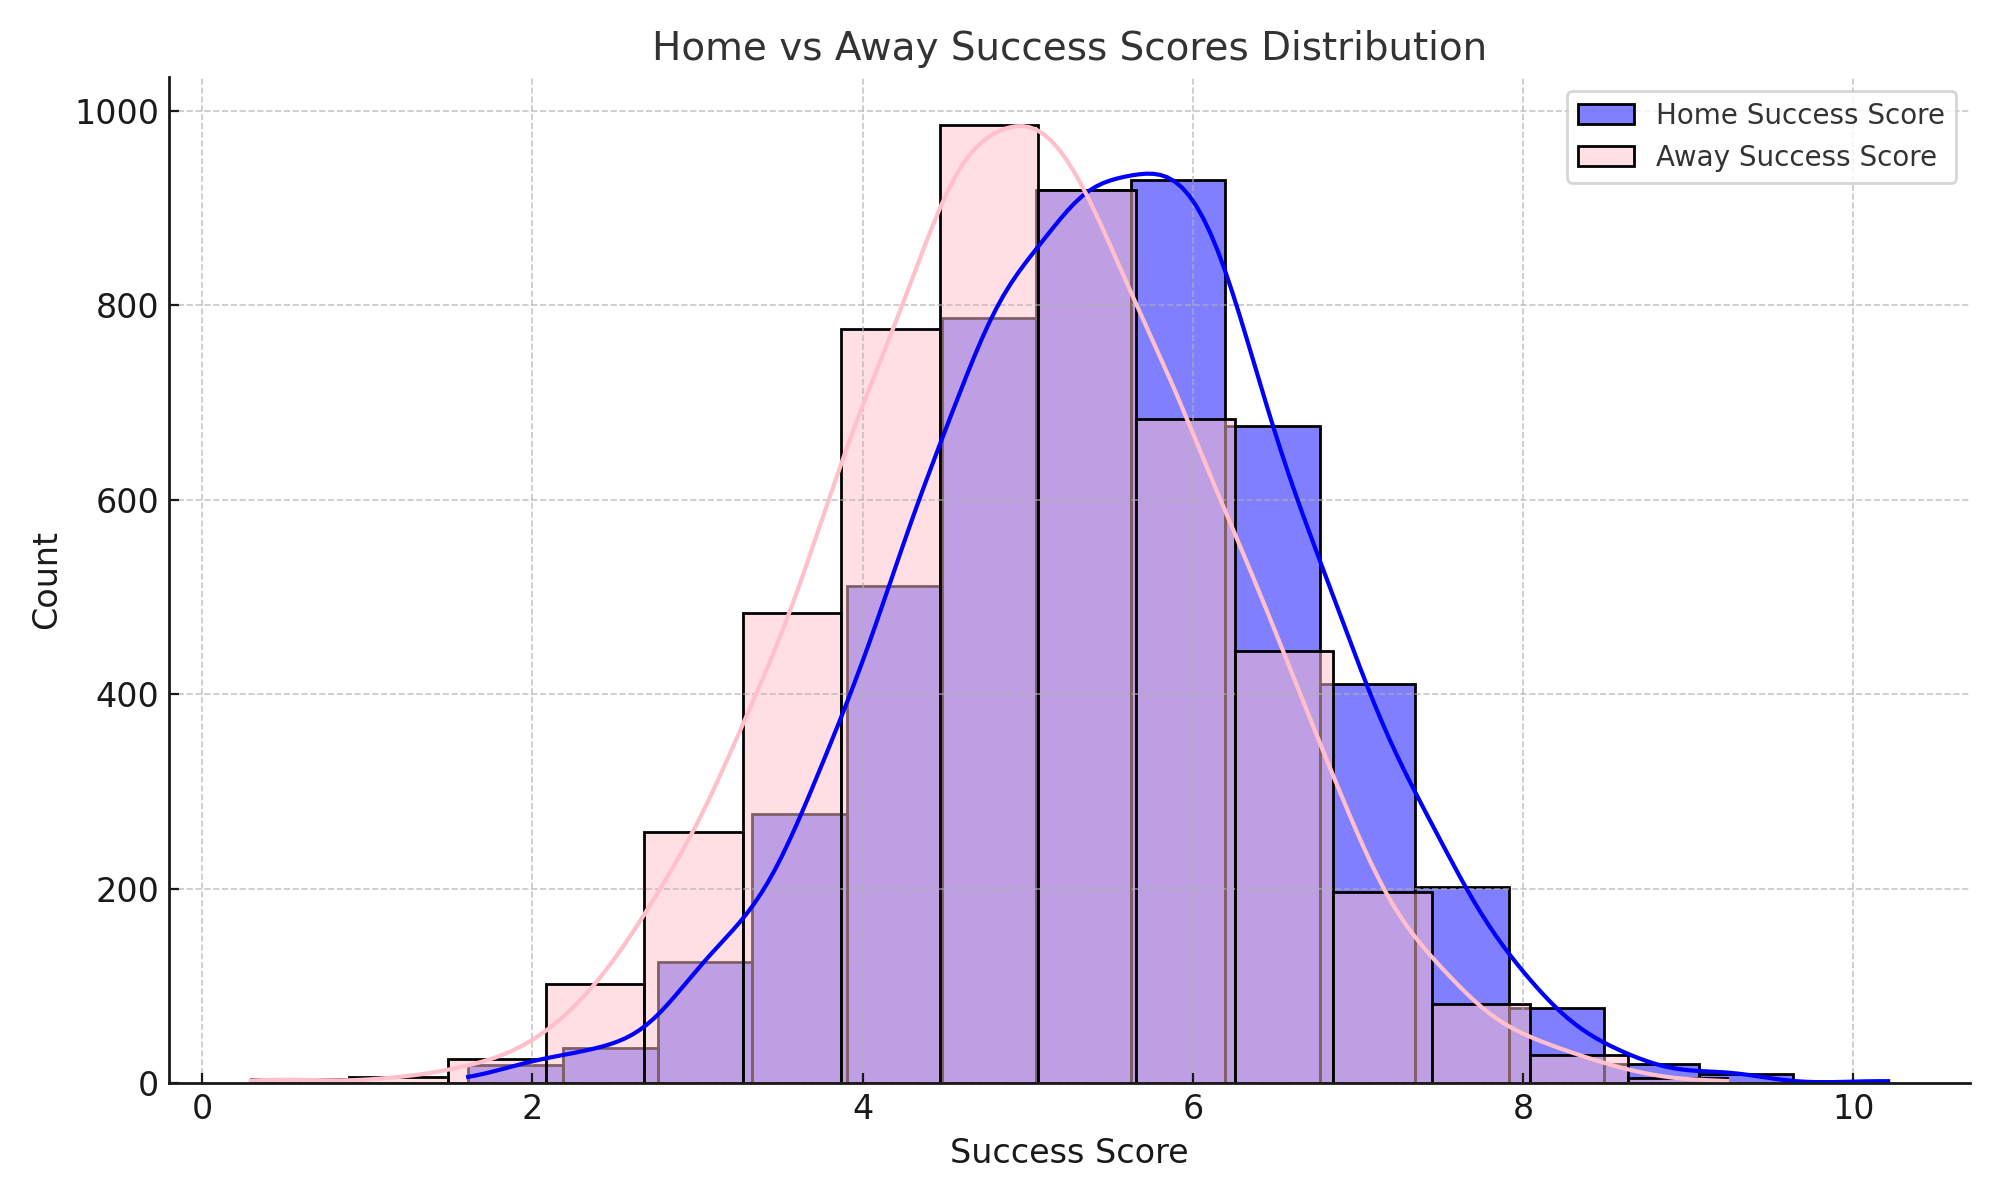


**Supplementary Figure S2. Training and validation loss across cross-validation folds.**

MAE per epoch for five folds of training the DNN. Training loss decreases steadily; validation loss remains low and stable, indicating effective learning and limited overfitting. *MAE, mean absolute error; DNN, deep neural network.*


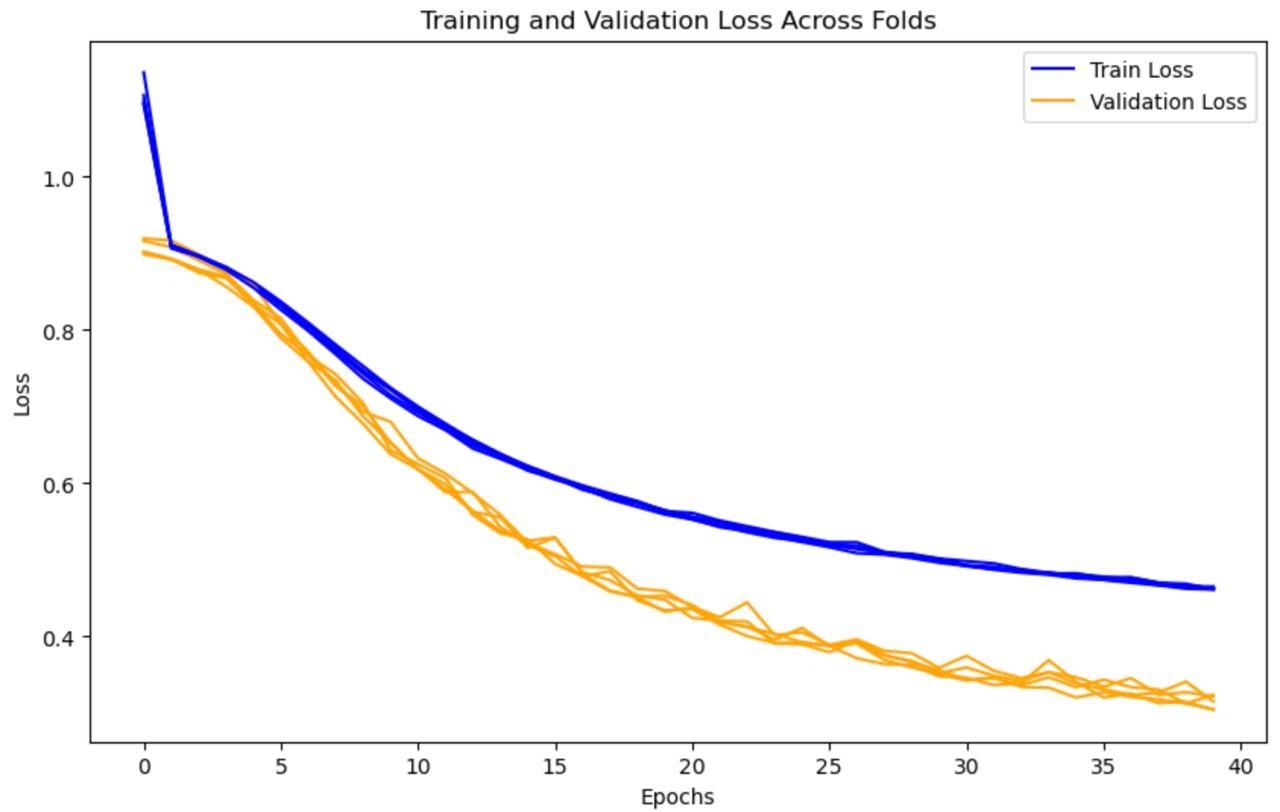


**Supplementary Table S1. Per-match case study breakdowns for Manchester United and FC Barcelona (2024–2025, weeks 2–11).**

For each match: week, home/away teams and scores, Actual SS, Predicted SS, outcome and performance label (Solid vs Poor). “Solid” indicates meeting/exceeding predicted potential; “Poor” indicates under-performance relative to a predicted advantage.

| **Week** | **Home Team** | **Away Team** | **Home** **Score** | **Away** **Score** | **Actual**  **Success Score** | **Predicted**  **Success Score** | **Outcome** | **Performance** |
| --- | --- | --- | --- | --- | --- | --- | --- | --- |
| 2 | Brighton | **Manchester United** | 2 | 1 | 4.33 | 5.8 | home win | **poor** |
| 3 | **Manchester United** | Liverpool | 0 | 3 | 3.36 | 5.37 | away win | **poor** |
| 4 | Southampton | **Manchester United** | 0 | 3 | 6.95 | 4.60 | away win | **solid** |
| 5 | Crystal Palace | **Manchester United** | 0 | 0 | 5.72 | 5.18 | draw | **solid** |
| 6 | **Manchester United** | Tottenham Hotspur | 0 | 3 | 2.84 | 5.38 | away win | **poor** |
| 7 | Aston Villa | **Manchester United** | 0 | 0 | 5.08 | 4.72 | draw | **solid** |
| 8 | **Manchester United** | Brentford | 2 | 1 | 5.87 | 5.47 | home win | **solid** |
| 9 | West Ham United | **Manchester United** | 2 | 1 | 4.63 | 5.11 | home win | **poor** |
| **Week** | **Home Team** | **Away Team** | **Home** **Score** | **Away** **Score** | **Actual**  **Success Score** | **Predicted**  **Success Score** | **Outcome** | **Performance** |
| 2 | **Barcelona** | Athletic Club | 2 | 1 | 6.08 | 5.89 | home win | **solid** |
| 3 | Rayo Vallecano | **Barcelona** | 1 | 2 | 5.36 | 4.98 | away win | **solid** |
| 4 | **Barcelona** | Real Valladolid | 7 | 0 | 7.61 | 6.87 | home win | **solid** |
| 5 | Girona | **Barcelona** | 1 | 4 | 5.98 | 5.04 | away win | **solid** |
| 6 | Villarreal | **Barcelona** | 1 | 5 | 5.57 | 5.16 | away win | **solid** |
| 7 | **Barcelona** | Getafe | 1 | 0 | 6.88 | 5.80 | home win | **solid** |
| 8 | Osasuna | **Barcelona** | 4 | 2 | 4.32 | 6.07 | home win | **poor** |
| 9 | Deportivo Alaves | **Barcelona** | 0 | 3 | 7.33 | 5.69 | away win | **solid** |
| 10 | **Barcelona** | Sevilla | 5 | 1 | 6.31 | 6.22 | home win | **solid** |
| 11 | Real Madrid | **Barcelona** | 0 | 4 | 6.65 | 4.50 | away win | **solid** |
